# Supplementary material for: A Ten-Week Motor Skills Training Program Increases Motor Coordination in Children with Developmental Coordination Disorder
Source: Preprints.org preprint supplement (doi:10.20944/preprints202110.0337.v1), 2021-10-25
Supplement: Supplementary file 1 [file supplementary]

## Faculty of Physical Culture

### Urgench State University

---

Urgench, Uzbekistan

Number: 12356

#### Decision of the Ethical Committee

This is to inform that members of the ethical committee of the Faculty of Physical Culture conducted board meeting on August 7, 2020 in the occasion to discuss the following proposal.

Members of the Ethical Committee at Urgench State University have reviewed the research proposal raised by Orifjon Saidmamatov on "A ten-week motor skills training program increases motor coordination in children with Developmental Coordination Disorder" that aims to conduct studies with 4-6 aged children in the Khorezm region.

It is to confirm that the project is in line with the Uzbek requirements as well as the World Medical Association Declaration of Helsinki and the principles of Good Clinical Practice.

Dean

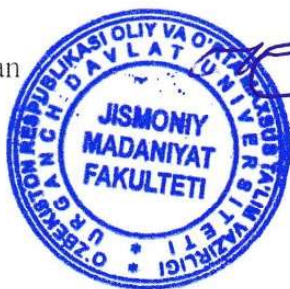

S. Ko'palov
